# Supplementary material for: The Association Between Race, Obesity, and Sperm Quality Among Men Attending a University Physician Practice in Washington, DC
Source: PubMed Central journal article supplement — Am J Mens Health. 2020 Jun 30;14(3):1557988320925985. doi: 10.1177/1557988320925985 (PMC7328221; doi:10.1177/1557988320925985), 2020-06-30
Supplement: Table_S1._Demographic_and_lifestyle_differences_by_BMI_class_(n=128).pdf [file Table_S1._Demographic_and_lifestyle_differences_by_BMI_class_%28n%3D128%29.pdf]

**Supplemental Table 1. Demographic and lifestyle differences by BMI class (n=128)<sup>1</sup>**

| <b>Significant p-values bolded</b>       | <b>Normal, % (N)</b> | <b>Overweight, % (N)</b> | <b>Obese, % (N)</b> | <b>p-Value</b>                |
|------------------------------------------|----------------------|--------------------------|---------------------|-------------------------------|
|                                          | 17.2 (22)            | 34.4 (44)                | 45.3 (58)           | -                             |
| <b>Ethnicity</b>                         |                      |                          |                     | 0.57 <sup>2</sup>             |
| Non-Hispanic                             | 95.5 (21)            | 85.7 (36)                | 89.6 (43)           |                               |
| Hispanic                                 | 4.6 (1)              | 14.3 (6)                 | 10.4 (5)            |                               |
| <b>Race</b>                              |                      |                          |                     | <b>0.0005<sup>2</sup></b>     |
| White                                    | 82.8 (18)            | 63.4 (26)                | 40.4 (21)           |                               |
| Black                                    | 9.1 (2)              | 14.3 (6)                 | 48.1 (25)           |                               |
| Other                                    | 9.1 (2)              | 22.0 (9)                 | 11.5 (6)            |                               |
| <b>Age</b>                               |                      |                          |                     | <b>0.02<sup>3</sup></b>       |
| Mean ± s.d.                              | 37.6 ± 5.4           | 38.1 ± 6.1               | 42.1 ± 8.0          | <b>0.02<sup>4</sup></b>       |
| Median (IQR)                             | 35.9 (6.4)           | 38.2 (8.4)               | 42.6 (13.9)         |                               |
| <40                                      | 72.7 (16)            | 61.4 (27)                | 41.4 (24)           |                               |
| ≥40                                      | 27.3 (6)             | 38.6 (17)                | 58.6 (34)           |                               |
| <b>Abstinence Time</b>                   |                      |                          |                     | 0.85 <sup>3</sup>             |
| Mean ± s.d.                              | 3.8 ± 1.2            | 4.6 ± 5.6                | 6.0 ± 12.1          |                               |
| Median (IQR)                             | 4.0 (1.0)            | 4.0 (1.5)                | 4 (2.0)             |                               |
| <b>Clinic</b>                            |                      |                          |                     | <b>&lt;0.0001<sup>2</sup></b> |
| IVF                                      | 95.5 (21)            | 88.6 (39)                | 19.0 (11)           |                               |
| Endocrine/Internal Medicine              | 4.6 (1)              | 11.4 (5)                 | 81.0 (47)           |                               |
| <b>Smoking</b>                           |                      |                          |                     | 0.06 <sup>2</sup>             |
| Never                                    | 68.2 (15)            | 72.7 (32)                | 50.9 (29)           |                               |
| Former                                   | 31.8 (7)             | 15.9 (7)                 | 35.1 (20)           |                               |
| Current                                  | 0.0 (0)              | 11.4 (5)                 | 14.0 (8)            |                               |
| <b>Amount of Alcohol Consumed a week</b> |                      |                          |                     | <b>0.02<sup>2</sup></b>       |
| None                                     | 9.5 (2)              | 15.9 (7)                 | 39.3 (22)           |                               |
| 1 to 2 times/week                        | 47.6 (10)            | 54.5 (24)                | 39.3 (22)           |                               |
| 3 or more times/week                     | 42.9 (9)             | 29.6 (13)                | 21.4 (12)           |                               |
| <b>Diabetes Diagnosis</b>                |                      |                          |                     | 0.18 <sup>2</sup>             |
| No                                       | 95.5 (21)            | 90.7 (39)                | 80.7 (46)           |                               |

|                         |           |           |           |                               |
|-------------------------|-----------|-----------|-----------|-------------------------------|
| Yes                     | 4.6 (1)   | 9.3 (4)   | 19.3 (11) |                               |
| <b>College Degree</b>   |           |           |           | <b>&lt;0.0001<sup>2</sup></b> |
| Yes                     | 86.4 (19) | 91.1 (40) | 55.2 (32) |                               |
| No                      | 13.6 (3)  | 9.1 (4)   | 44.8 (26) |                               |
| <b>Bicycling Habits</b> |           |           |           | <b>0.19<sup>2</sup></b>       |
| Never                   | 64.6 (14) | 52.4 (22) | 58.9 (33) |                               |
| Occasional              | 27.3 (6)  | 21.4 (9)  | 32.1 (18) |                               |
| Moderate to Frequent    | 9.1 (2)   | 26.2 (11) | 8.9 (5)   |                               |
| <b>Underwear Type</b>   |           |           |           | <b>0.87<sup>4</sup></b>       |
| Boxers                  | 33.3 (7)  | 27.3 (12) | 30.9 (17) |                               |
| Briefs or Boxer Briefs  | 66.7 (14) | 72.7 (32) | 69.1 (38) |                               |

BMI, Body Mass Index; IVF, In Vitro Fertilization. P-values from Chi-square or Fisher's exact test as appropriate.

<sup>1</sup> BMI categorized according to Centers for Disease Control and Prevention guidelines for normal weight (18.5 - 24.9 kg/m<sup>2</sup>), overweight (25 - 29.9 kg/m<sup>2</sup>), and obese ( $\geq 30$  kg/m<sup>2</sup>). N=4 missing values for BMI.

<sup>2</sup> P-values generated using a Fisher's exact test to account for cells with 5 participants or fewer

<sup>3</sup> P-values for differences in means generated using a Kruskal-Wallis test

<sup>4</sup> P-values generated using a Chi-square test
